# Supplementary material for: Formation of an unexpected 3,3-diphenyl-3H-indazole through a facile intramolecular [2 + 3] cycloaddition of the diazo intermediate
Source: publisher site journal article supplement (doi:10.3762/bjoc.15.134), 2019-06-19
Supplement: Additional file 1 [file 1860-5397-15-134-S1.pdf]

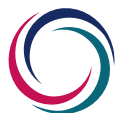

## Supporting Information

for

### **Formation of an unexpected 3,3-diphenyl-3*H*-indazole through a facile intramolecular [2 + 3] cycloaddition of the diazo intermediate**

Andrew T. King, Hugh G. Hiscocks, Lidia Matesic, Mohan Bhadbhade, Roger Bishop and Alison T. Ung

*Beilstein J. Org. Chem.* **2019**, *15*, 1347–1354. doi:10.3762/bjoc.15.134

### **Copies of $^1\text{H}$ NMR, $^{13}\text{C}$ NMR and IR of compound 8**

## NMR spectra of compound 8

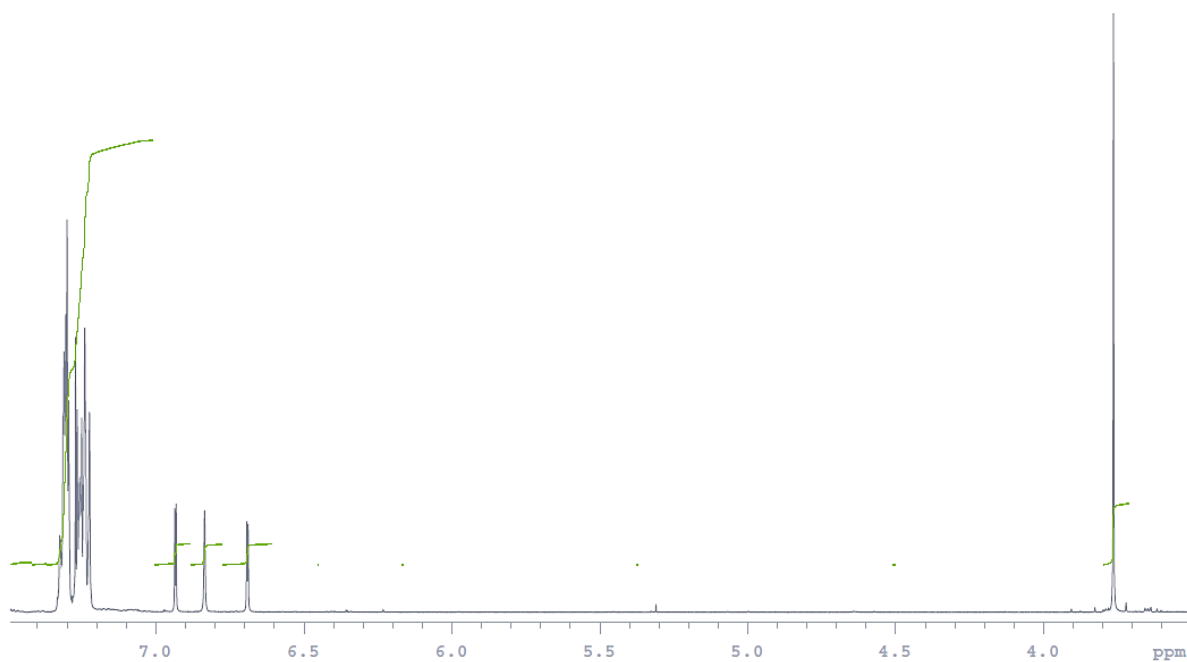

**Figure S1:** <sup>1</sup>H NMR (CDCl<sub>3</sub>, 500 MHz) of compound 8.

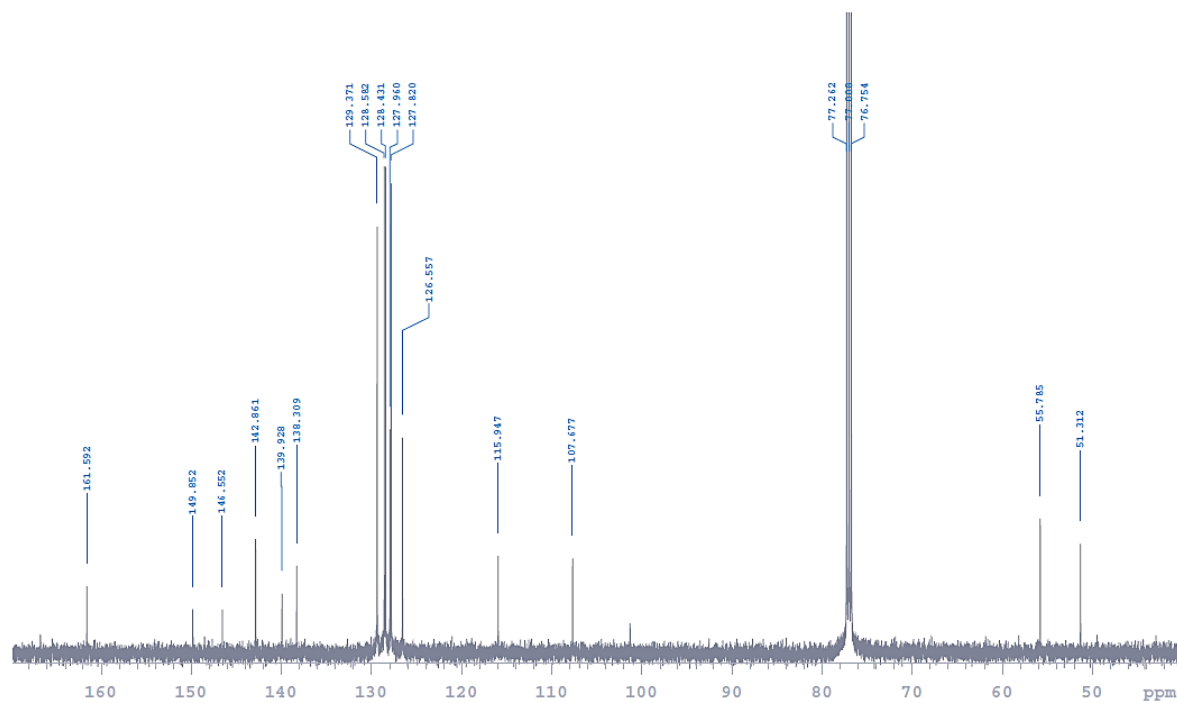

**Figure S2:** <sup>13</sup>C NMR (CDCl<sub>3</sub>, 125 MHz) of compound 8.

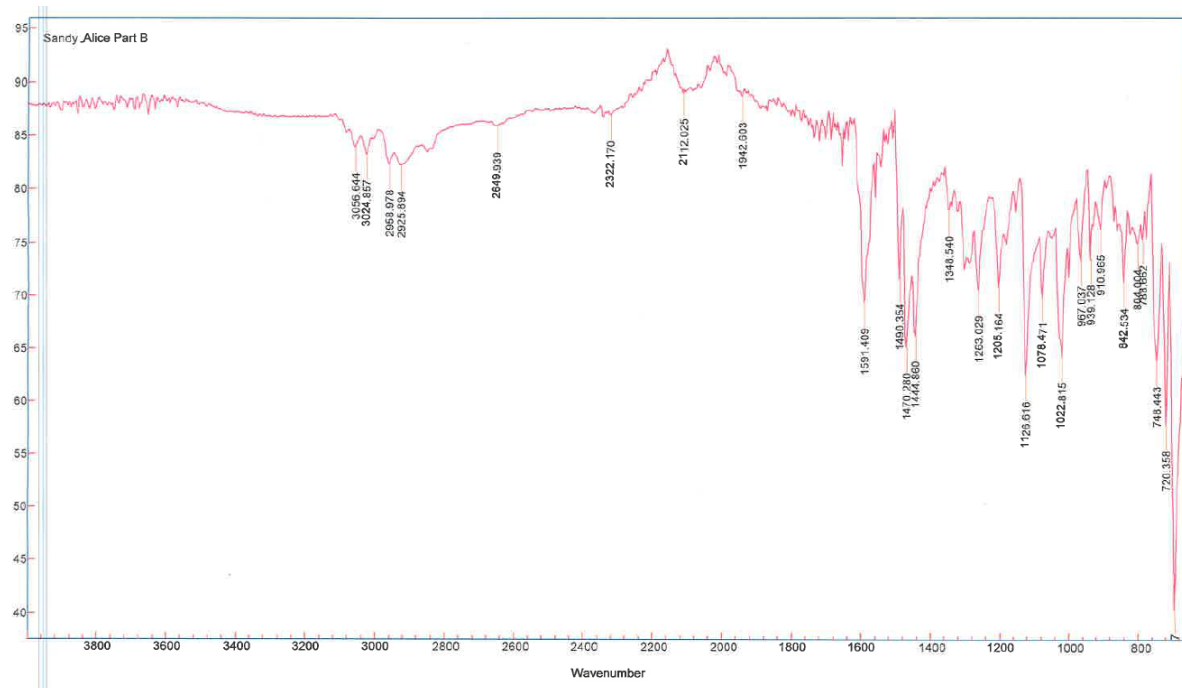

**Figure S3:** ATIR of compound **8**.
